# Supplementary material for: Incidence and factors associated with hemodynamic change At Post Anesthesia Care Unit among adult surgical patients At Wachemo University Nigest Elleni Mohammed Memorial Comprehensive Specialized Hospital, 2023: Ethiopia, A prospective Observational study
Source: Research Square preprint supplement (doi:10.21203/rs.3.rs-4959888/v1), 2024-10-17
Supplement: Supplementary file 1 [file 083d53b0d4d0f880696803b0.docx]

Table 1

Demographic characteristics of adult Surgical Patients in Post Anaesthesia Care Unit, 2024

| Variable | frequency | percentage (%) |
| --- | --- | --- |
| Age  18-34 | 181 | 44.25% |
| 35-49 | 119 | 29.1% |
| 50-64 | 62 | 15.2% |
| >65 | 47 | 11.49% |
| Sex  Male | 253 | 62% |
| Female | 156 | 38% |
| BMI  Underweight | 51 | 12.46% |
| Normal weight | 328 | 80.2% |
| obesity | 30 | 7.33% |
| NPO time  >=8hr | 108 | 26.4% |
| <8hr | 301 | 73.6% |

**Table 2**

Patient characteristics among Adult Surgical Patients in Post Anaesthesia Care Unit, 2024. (n=409)

| Variable | frequency | percentage (%) |
| --- | --- | --- |
| ASA Classification  ASA I | 282 | 68.9% |
| ASA II | 96 | 23.4% |
| ASA III | 31 | 7.4% |
| Urgency of procedure  Elective | 249 | 60.8% |
| Emergency | 160 | 38.2% |
| History of medication  Beta blocker and PTU | 45 | 11% |
| Other medication | 25 | 6.11% |
| None | 330 | 80.6% |
| History of past medical illness  Hypertension | 17 | 4.2% |
| Asthma | 15 | 3.67% |
| Other disease | 21 | 5.13% |
| None | 356 | 87 % |

ASA = American Society of Anaesthesiologist, Other medication = HAART, Ca channel blocker, diuretics, ACEI, heparin, insulin, other disease = HIV, Diabetes, DVT prophylaxis.

Table 3.Anaesthesia and surgery related factors and percentage of hemodynamic instability among Adult Surgical Patients in Post Anaesthesia Care Unit, 2024, (n=409)

Variable frequency (n) percentage(%) Hemodynamic instability in PACU

Stable (n=189) unstable(n=220)

Intraoperative hemodynamic instability

| Stable 316 | 77.3% | 189 | 220 |
| --- | --- | --- | --- |
| Unstable 93  Intraoperative fluid administered | 21.1% | 19 | 74 |
| <2500ml 262 | 64% | 130 | 132 |
| 2500-3500ml 105 | 25.67% | 34 | 71 |
| >3500ml 41 | 10% | 9 | 32 |

Intraoperative blood loses

| <=100ml 45 | 11.1% | 30 | 15 |
| --- | --- | --- | --- |
| 100-200ml 81 | 19.8% | 36 | 45 |
| 200-400ml 239 | 58.6% | 78 | 161 |
| >=400ml 44  Duration in the OR | 10.75% | 18 | 26 |
| <=1hr 84 | 20.5% | 53 | 31 |
| 1-2hr 164 | 40% | 102 | 62 |
| 2-4hr 105 | 25.67% | 40 | 65 |
| >=4hr 56  Timing of surgery | 13.69% | 13 | 43 |
| Day 303 | 72.3% | 150 | 153 |
| Night 106 | 27.7% | 59 | 47 |

**Table 4**

Postoperative Variables and their Percentage among adult surgical patients in post anaesthesia care unit, 202, (n = 409).

| Variable |  | frequency | percent |
| --- | --- | --- | --- |
| Respiratory Adverse Events | Yes | 107 | 26.2% |
|  | NO | 302 | 73.8% |
| Postoperative nausea and vomiting | Yes | 75 | 18% |
|  | N0 | 334 | 82% |
| Agitation status | Yes | 165 | 40.3% |
|  | NO | 244 | 59.7% |
| Postoperative pain | Yes | 169 | 41.1% |
|  | NO | 240 | 59.9% |

Table 5

Bivariable and multivariable logistic regression analysis of factors associated with hemodynamic instability among Adult Surgical Patients in Post Anaesthesia Care unit.2024, (n=409).

Variable COR (95% CI) P-value AOR (95%CI) P-value

Surgical speciality

orthopaedics 1 0.75 1

Gynaecologic 0.57(0.61-3.6) 0.15 2 .5 (0.034-2.34) 0.0021

Abdominal 0.72(0.54-2.5 0.12 1.2(0.2-3.2) 0.23

Neurologic 2.54(1.1-5.5) 0.021 2.1(0.2-6.1) 0.02

ENT 0.43(0.25-1.51) 0.62 1.73(0.05-5.3) 0.45

Type of Anesthesia

General. 1 1

Regional 1.56(0.9-3.1) 0.167 3.1(1.4-9.1) 0.0023

Sedation 0.53(0.23-2.5) 0.53 1.3(0.02-2.4) 0.026

Premedication beta blocker 3.5(0.56-5.6) 0.054

2.6(0.05-3.6) 0.0012

History. None 1 1

ASA classification ASAI 1 1

ASA II 2.1(1.3-3.6) 0.023 0.8(0.03-2.5) 0.6

ASAIII 3.5(1.2-5.2) 0.003 2(0.06-4.61) 0.024

Duration of surgery <=1hr 1 1

1-2hr 0.83(o.45-1.9) 0.54 0.43(0.07-1.6) 0.34

2-4hr 1.53(0.45-3.2) 0.042 0.65(0.5-4.1) 0.56

>=4hr 4.3(2.5-8.45) 0.0012 3.12(0.71-7.89)

0.032

Postoperative Yes 3.56(0.95-8.4) 0.001 2.51(0.52-8.1) 0.034

Respiratory adverse NO 1 1

Event

Intraoperative Yes 4(2.43-6.7) 0.001 4.1(1.53-8.1) 0.001

HDI NO 1 1

1=reference group, HDI, hemodynamic instability, significant in bivariable logistic regression, P-value <0.2. Significant multi-variable logistic regression, p-value <0.05*p<0.01,**p<0.001.COR -crude odd ratio .AOR -Adjusted -odd -ratio.
